# Supplementary material for: Assessment of Techno-Functional and Nutraceutical Potential of Tomato (Solanum lycopersicum) Seed Meal
Source: PubMed Central journal article supplement (PMC7571165; doi:10.3390/molecules25184235), 2020-09-15
Supplement: molecules-25-04235-s001.pdf [file molecules-25-04235-s001.pdf]

## Supplementary material

### Assessment of techno-functional and bioactive potential of tomato (*Solanum lycopersicum*) seed

meal

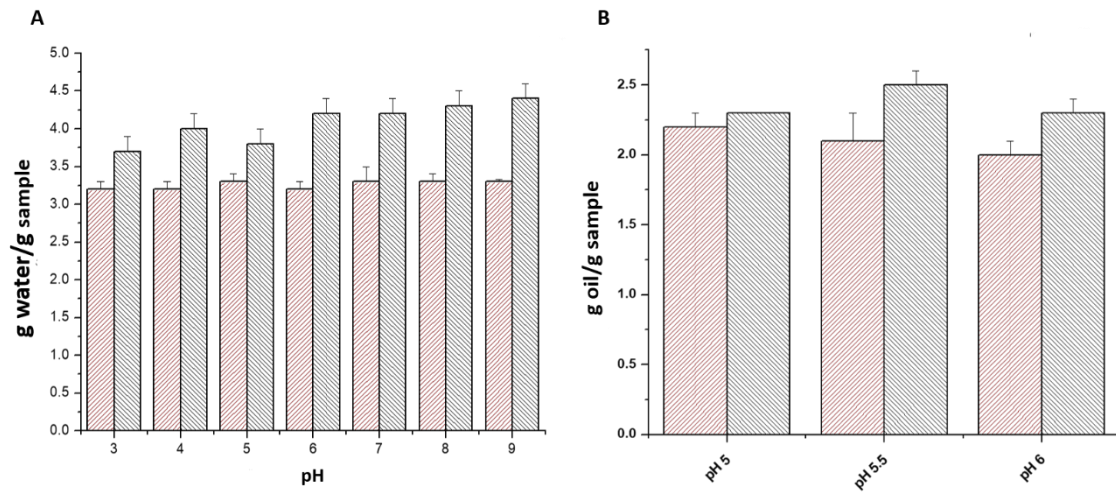

**Fig. S1.** Holding capacity of fluids. A, Water Holding Capacity; B, Oil Holding Capacity. Red bars are corresponding to TSM sample; gray bars are corresponding to TSMD sample.

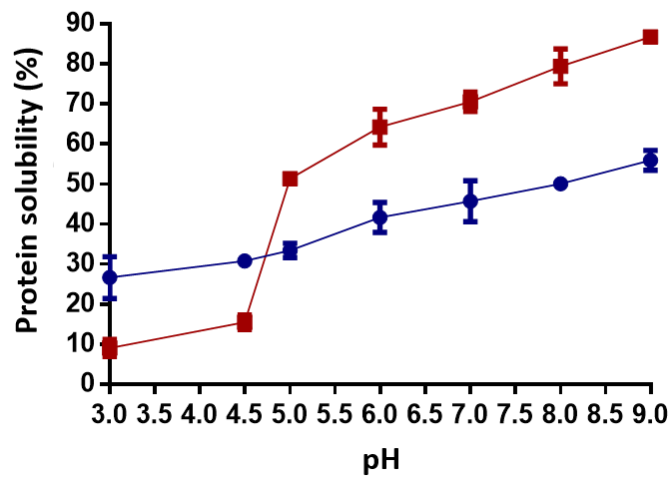

**Fig. S2.** Protein solubility of tomato seed meal. Blue line, shows protein solubility for TSM sample; red line, shows proteins solubility for TSMD sample.

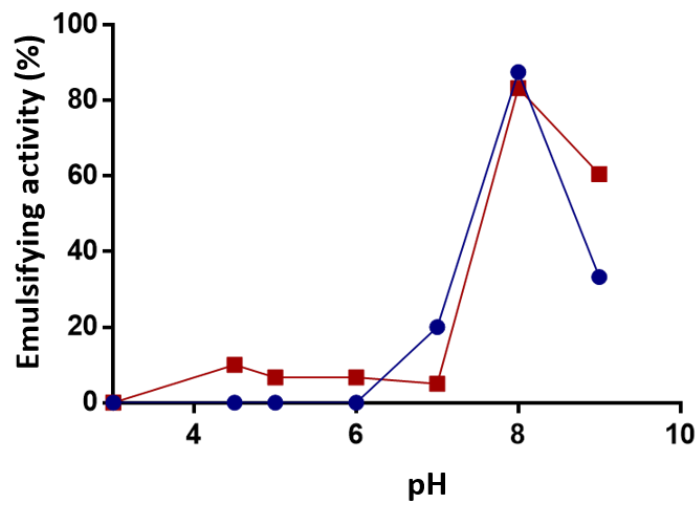

**Fig. S3.** Emulsifying activity of tomato seed meal. Blue line, shows protein solubility for TSM sample; red line, shows proteins solubility for TSMD sample.
